# Supplementary material
Source: Research Square preprint supplement (doi:10.21203/rs.3.rs-9437605/v1)
Supplement: Supplementary file 1 [file 58feb18f501303db48ace3de.pdf]

# Analytical Tool of developing a Saudi Food Composition Database

Basic elements & Instruction

November -2024

## General Instruction

- This is a manual will be used as a guide to conduct the Analytical tool in Excel.
- Please use the **'Reference'** in foot of the page as a guide help to more understanding for the stated point.
- **UD** = Undefined information according to the reference (study).
- **NA** = Not Applicable to answer for irrelevant information according to the reference (study) for a certain entry.
- **FYI** = For Your Information and no action is needed.

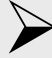

**A#**

**= Appendix out the file.**

**A1**

**= An Example of Parts of Plants That We Generally Consume.**

**A2**

**= An Example Meat Cuts That We Generally Consume.**

**A3**

**= An Example Poultry Meat Cuts That We Generally Consume.**

**A4**

**= Food and Agriculture Organization of United Nations - Recipe and Other Calculations.**

**A5**

**= FAO/INFOODS Guidelines for Converting Units, Denominators and Expressions Version 1.0.**

**A6**

**= Chapter 7 From Food Composition Data Book (Second Edition) - Review of Methods of Analysis.**

- **Please note that certain parts may vary in sequence inside Excel file than this instruction for organizational purposes, such as:**
  - **Section (3.1.4.1.) will transfer to AT-1 in Excel because the information is per food not per component.**
- **Please include only the component in the tool, if the study has another component, then you should skip it and not include it.**
- **Please note that some studies might include value for components from other or previous references as a comparison with the study results, these values should not be considered to include as an input in the tool.**
- **When a food product prepared for the purpose of the study it is considered Cooked not Manufactured.**

- **When certain information is not available in a reported literature and the input is 'open Q', please state (UD) or (NA) according to study information.**
- **ALL cell in Excel 'AT-1' and 'AT-2&3' has to have a value (nothing left out) except for 'NOTE' cell.**
- **For '2.5. Expression', usually it's mentions in studies as (express as ....).**
- **For '3.2.Analytical Assurance', you need to fill column 'Name of laboratory' as role:**
  1. If the '3.2.1.Name of laboratory' stated in the study, then you will reported in the cell, color the cell in Yellow, and leave the column '3.2.2.Analytical Assurance' without any choice.
  2. If the '3.2.1.Name of laboratory' not stated, then you will Write 'UD' and choose 'Analyzed with an internationally recognized method' from '3.2.2.Analytical Assurance' column.

➤ **The Tool generally is consisted of three parts:**

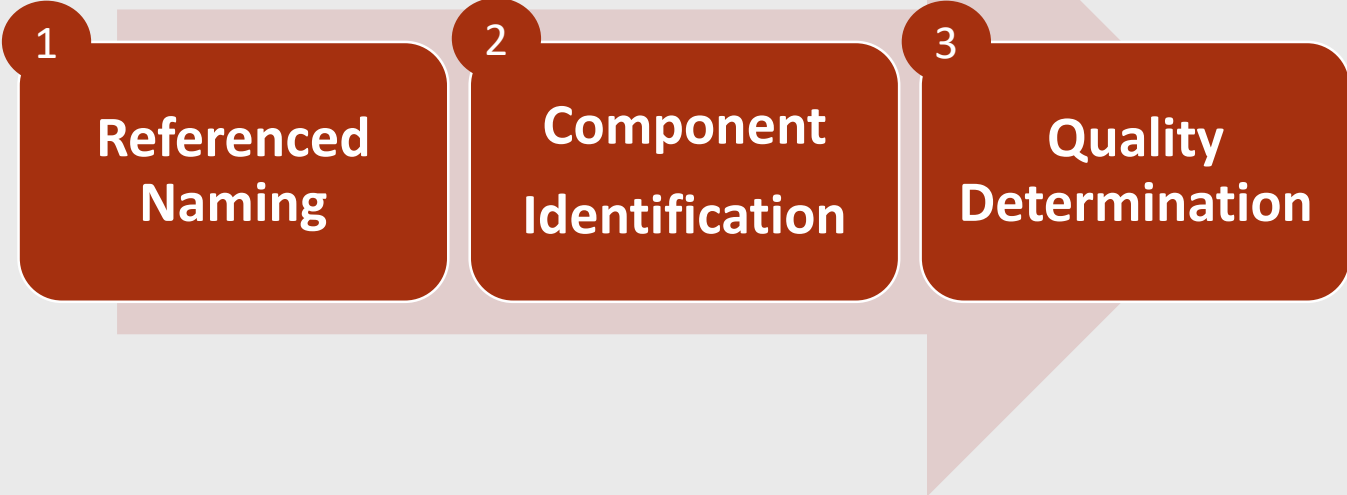

➤ **Definitions:**

- 1. Referenced Naming:** This represents all factors that are considered to determine each food name in the database.
- 2. Food Component:** This represents the output information about food value, as stated in the references.
- 3. Quality Determination:** This represents the information that will be used in the food matching determination process.

- In Excel the tool divide to three parts:
  - ❑ AT-0 – Reference Studies.
  - ❑ AT-1 – **Reference Naming** + Section ‘3.1.4.1. IF CALCULATED RECIPE – YIELD FACTOR’ of **Quality Determination**
  - ❑ AT-2&3 – 11 Sheets of **Components Identification** and **Quality Determination**.

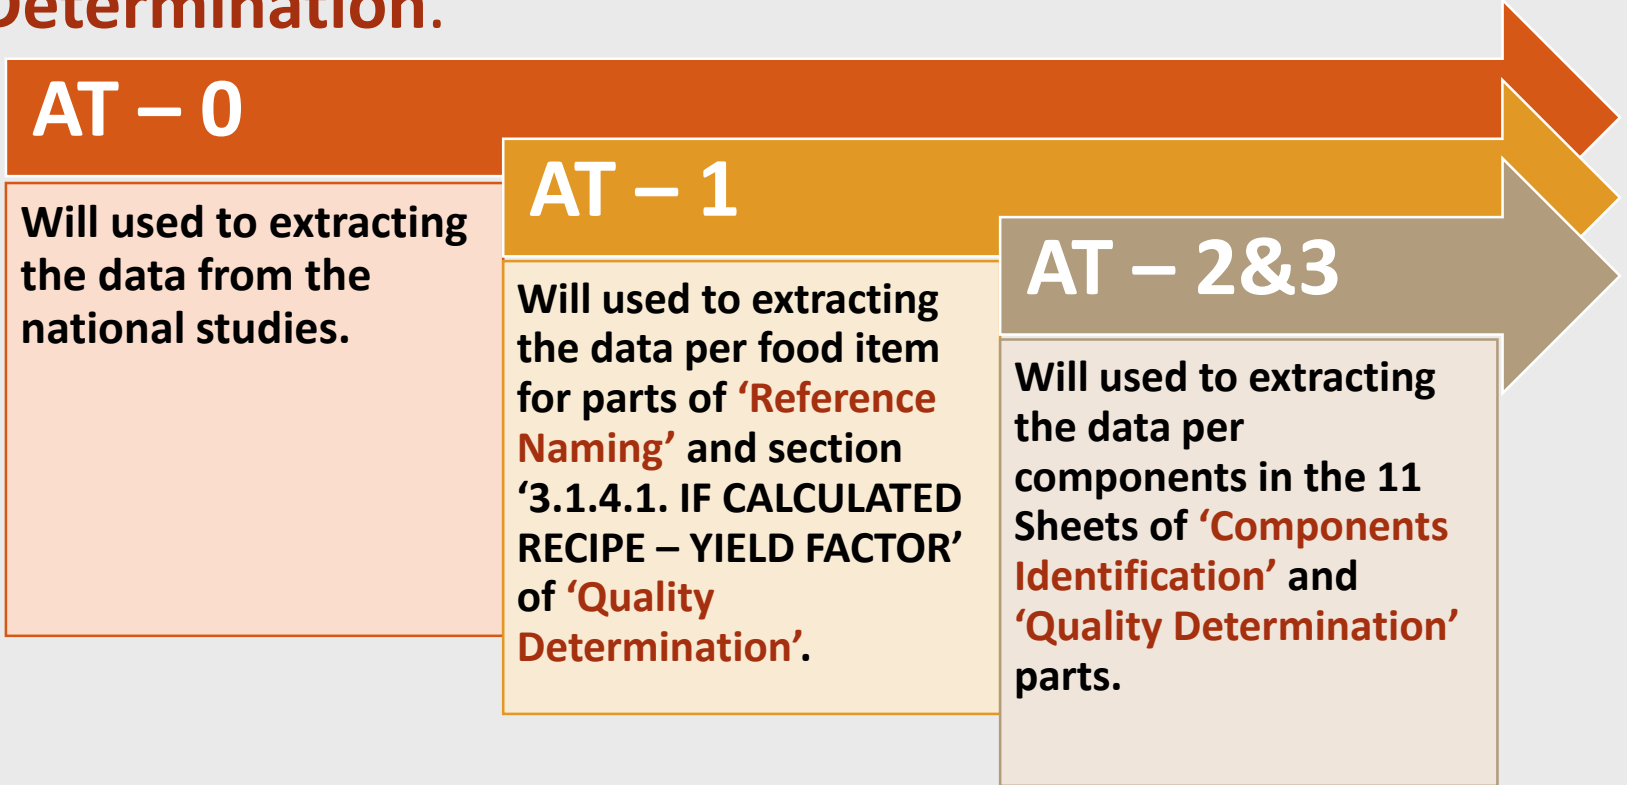

# **1. Referenced Naming**

**1.1. FOOD NAME IN OWN LANGUAGE(S) – ARABIC**

**1.2. ENGLISH FOOD NAMES**

**1.3. SCIENTIFIC NAMES**

**1.4. FOOD CONDITION**

**1.5. FOOD EDIBILITY**

**1.6. EDIBLE/INEDIBLE PORTION**

**1.7. COOKING METHODS**

**1.8. ADDITIONAL PRINCIPALS FOR COOKING METHODS**

**1.9. FOOD PROCESSED DURING MANUFACTURING**

**1.10. COLOR**

**1.11. BIODIVERSITY**

**1.12. MATURITY STAGE**

**1.13. WILD VS. DOMESTICATED PLANTS AND ANIMALS**

**1.14. PART/SOURCE OF THE FOOD**

**1.15. FORTIFICATION/ENRICHMENT OF PROCESSED  
FOOD FORTIFICATION AND SUPPLEMENTATION**

**1.16. RECIPES INFORMATION**

## 1.1. FOOD NAME IN OWN LANGUAGE(S) - ARABIC

Please write the name of the food in Arabic Language.

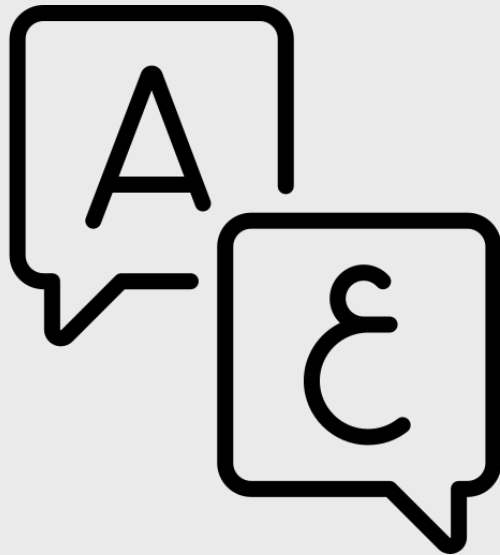

## 1.2. ENGLISH FOOD NAMES

Please write the name of the food in English Language as stated in study.

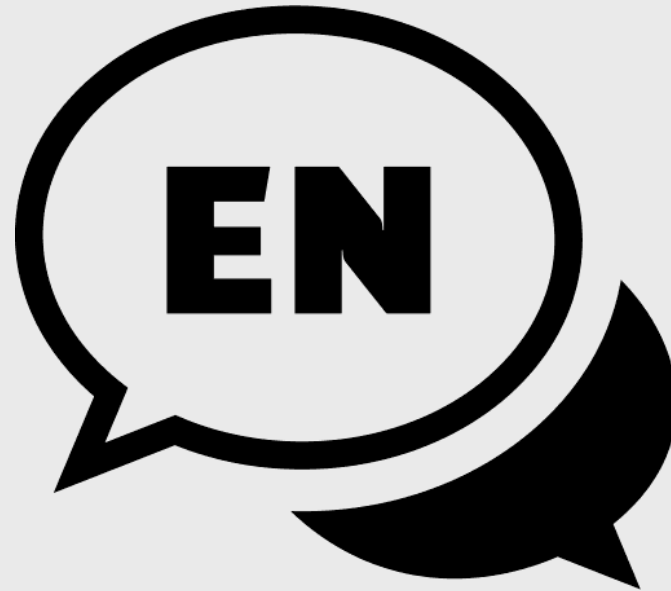

## 1.3. SCIENTIFIC NAMES

❑ Please write the scientific name of the food as stated in study.

**Scientific Names**

## 1.4. FOOD CONDITION

Please choose one of the below input:

| 1.4.1.FOOD CONDITION - 1 |       |
|--------------------------|-------|
| Criteria                 | Input |
| Raw Food                 | R     |
| Manufactured Food        | M     |
| Cooked food              | C     |

### Note

- Please note that fresh and dried food will include in 'Raw Food' category.
- Please note that canned foods will include in 'Manufactured Food' category.

# FOOD CONDITION

☐ Please choose one of the below input:

| 1.4.2.FOOD CONDITION - 2 |       |
|--------------------------|-------|
| Criteria                 | Input |
| Fresh                    | F     |
| Dried                    | D     |
| Processed                | C     |
| Prepared                 | P     |

## Note FYI

- Processed indicate food that's changed in any way from its natural state. That includes washing, canning, freezing, adding ingredients to it, baking, cooking, or preparing by manufacturers.

E.g. cheese, tinned vegetables, bread, savory snacks (such as pasties), meat products, ready meals, cakes and biscuits.

- Prepared indicate food which has been prepared by human in home (households) or in restaurants (chefs) that sold to be eaten at home.

## 1.5. FOOD EDIBILITY

☐ Please choose one of the below input:

| 1.5.FOOD EDIBILITY |       |
|--------------------|-------|
| Criteria           | Input |
| Edible             | E     |
| Inedible           | I     |

### Note FYI

- Edible portions indicate the part of the food that is usually eaten and it'll be chose if the food was all edible.
  - For example; exclude the inedible part/s such as skin or pips of certain fruits and vegetables breast 'Chicken without skin' and 'Paprika without seeds'.
- Inedible portions indicate the part of the food that is usually do not eaten and it'll be chose if the food was include inedible part/s.
  - For example; stated or generalize the food indicate an inedible part/s such as 'Whole chicken' that mean is include bones and skin, and 'Rips' that mean is include bones and visible fat.

# 1.6. EDIBLE/INEDIBLE PORTION

☐ Please choose one of the below input:

## EDIBLE PORTION

| Criteria                      | Input  |
|-------------------------------|--------|
| 1.6.1.Which parts are edible? | OPEN Q |

## INEDIBLE PORTION

| Criteria                        | Input                             | 1.6.2.Note                                              |
|---------------------------------|-----------------------------------|---------------------------------------------------------|
| 1.6.2.Which parts are inedible? | <b>Specify from the drop list</b> | <b>If other, please state the name of inedible part</b> |

- A. Skin
- B. Seeds
- C. Peel
- D. Head
- E. Bones
- F. Visible fat
- G. Shell
- H. Pits/stones
- I. UD
- J. NA
- K. Other

# 1.7. COOKING METHODS

☐ Please choose one of the below input:

| 1.7.COOKING METHODS |       |                                                  |
|---------------------|-------|--------------------------------------------------|
| Criteria            | Input | 1.7.Note                                         |
| Boiling             | A     | <b>Please state any details about the method</b> |
| Water absorption    | B     |                                                  |
| Baking              | C     |                                                  |
| Earth oven          | D     |                                                  |
| Deep frying         | E     |                                                  |
| Shallow frying      | F     |                                                  |
| Steaming            | G     |                                                  |
| Roasting            | H     |                                                  |
| Grilling            | I     |                                                  |
| Microwave           | J     |                                                  |

| COOKING METHODS Cont.... |       |                                                  |
|--------------------------|-------|--------------------------------------------------|
| Criteria                 | Input | 1.7.Note                                         |
| Braising                 | K     | <b>Please state any details about the method</b> |
| Stewing                  | L     |                                                  |
| Open-fire roasting       | M     |                                                  |
| Griddle or dry-frying    | N     |                                                  |
| Cooking in fire          | O     |                                                  |
| Tandoori                 | P     |                                                  |
| Pressure cooking         | Q     |                                                  |
| Not Applicable           | NA    |                                                  |
| Other                    | T     |                                                  |

## 1.8. ADDITIONAL PRINCIPALS FOR COOKING METHODS

☐ Please choose one of the below input:

| ADDITIONAL PRINCIPALS FOR COOKING METHODS                             |       |
|-----------------------------------------------------------------------|-------|
| Criteria                                                              | Input |
| 1.8.1.Is the visible fat (e.g. meat) removed before or after cooking? | Yes   |
|                                                                       | No    |
|                                                                       | UD    |
|                                                                       | NA    |

| ADDITIONAL PRINCIPALS FOR COOKING METHODS                                      |       |
|--------------------------------------------------------------------------------|-------|
| Criteria                                                                       | Input |
| 1.8.2.Is the peel/skin (e.g. vegetables/fish) removed before or after cooking? | Yes   |
|                                                                                | No    |
|                                                                                | UD    |
|                                                                                | NA    |

# ADDITIONAL PRINCIPALS FOR COOKING METHODS

☐ Please choose one of the below input:

| ADDITIONAL PRINCIPALS FOR COOKING METHODS                                                     |                                   |                                                                          |
|-----------------------------------------------------------------------------------------------|-----------------------------------|--------------------------------------------------------------------------|
| Criteria                                                                                      | Input                             | 1.8.3.Note                                                               |
| 1.8.3.How much of the cooking water is absorbed (e.g. rice), or part of the dish (e.g. soup)? | <b>Specify from the drop list</b> | <b>If other, please state the amount of water in any unit or measure</b> |

- A. 100 mL
- B. 150 mL
- C. 200 mL
- D. 250 mL
- E. 300 mL
- F. 350 mL
- G. UD
- H. NA
- I. Other

# ADDITIONAL PRINCIPALS FOR COOKING METHODS

Please choose one of the below input:

| ADDITIONAL PRINCIPALS FOR COOKING METHODS           |       |                                                                   |
|-----------------------------------------------------|-------|-------------------------------------------------------------------|
| Criteria                                            | Input | 1.8.4.Note                                                        |
| 1.8.4.Is the cooking water discarded after cooking? | Yes   | <b>Please state any details about the discarded cooking water</b> |
|                                                     | No    |                                                                   |
|                                                     | UD    |                                                                   |
|                                                     | NA    |                                                                   |

| ADDITIONAL PRINCIPALS FOR COOKING METHODS |       |                                                      |
|-------------------------------------------|-------|------------------------------------------------------|
| Criteria                                  | Input | 1.8.5.Note                                           |
| 1.8.5.Is salt added?                      | Yes   | <b>Please state any details about the added salt</b> |
|                                           | No    |                                                      |
|                                           | UD    |                                                      |
|                                           | NA    |                                                      |

# ADDITIONAL PRINCIPALS FOR COOKING METHODS

☐ Please choose one of the below input:

| ADDITIONAL PRINCIPALS FOR COOKING METHODS |        |
|-------------------------------------------|--------|
| Criteria                                  | Input  |
| 1.8.6.Which oil/fat is used for frying?   | OPEN Q |

# 1.9. FOOD PROCESSED DURING MANUFACTURING

☐ Please choose one of the below input:

| FOOD PROCESSED DURING MANUFACTURING                                                                                              |       |                                                         |
|----------------------------------------------------------------------------------------------------------------------------------|-------|---------------------------------------------------------|
| Criteria                                                                                                                         | Input | 1.9.1.Note                                              |
| 1.9.1.Are food components containing ingredients added <u>in processing</u> , either for flavoring (e.g. salt, seasonings, etc.) | Yes   | <b>Please state the added ingredients in processing</b> |
|                                                                                                                                  | No    |                                                         |
|                                                                                                                                  | UD    |                                                         |
|                                                                                                                                  | NA    |                                                         |

| FOOD PROCESSED DURING MANUFACTURING                                                                                                                |       |                                                     |
|----------------------------------------------------------------------------------------------------------------------------------------------------|-------|-----------------------------------------------------|
| Criteria                                                                                                                                           | Input | 1.9.2.Note                                          |
| 1.9.2.Are food components containing ingredients added as <u>functional properties</u> (e.g. preservatives, emulsifiers, anticaking agents, etc.)? | Yes   | <b>Please state the added functional properties</b> |
|                                                                                                                                                    | No    |                                                     |
|                                                                                                                                                    | UD    |                                                     |
|                                                                                                                                                    | NA    |                                                     |

# FOOD PROCESSED DURING MANUFACTURING

☐ Please choose one of the below input:

| FOOD PROCESSED DURING MANUFACTURING                                |       |                                                                   |
|--------------------------------------------------------------------|-------|-------------------------------------------------------------------|
| Criteria                                                           | Input | 1.9.3.Note                                                        |
| 1.9.3.Is the food canned/preserved in syrup, juice, brine, or oil? |       | <b>If other, please state the source of canned/preserved food</b> |
| • In syrup                                                         | S     |                                                                   |
| • In juice                                                         | J     |                                                                   |
| • In brine                                                         | B     |                                                                   |
| • In oil                                                           | O     |                                                                   |
| • No                                                               | No    |                                                                   |
| • Other                                                            | T     |                                                                   |
| • Information undefined                                            | UD    |                                                                   |
| • Information not applicable                                       | NA    |                                                                   |

## Note FYI

**Brine is salt and water and often described as a percentage (e.g. 'make a seven percent brine'), which refers to the ratio of salt to water.**

# 1.10. COLOR

☐ Please choose one of the below input:

| COLOR                                                      |                                   |                                                                             |
|------------------------------------------------------------|-----------------------------------|-----------------------------------------------------------------------------|
| Criteria                                                   | Input                             | 1.10.Note                                                                   |
| 1.10.What is the color/intensity of the color of the food? | <b>Specify from the drop list</b> | <b>If other, please state the color /intensity of the color of the food</b> |

- A. Yellow
- B. Orange
- C. Yellow orange
- D. Red
- E. Pink
- F. Blue
- G. Purple
- H. Green
- I. Light green
- J. Dark green
- K. Brown
- L. White
- M. reddish-white
- N. Black
- O. UD
- P. NA
- Q. Other

# 1.11. BIODIVERSITY

☐ Please choose one of the below input:

| BIODIVERSITY                                                                                |       |                                          |
|---------------------------------------------------------------------------------------------|-------|------------------------------------------|
| Criteria                                                                                    | Input | 1.11.Note                                |
| 1.11.Can the variety/cultivar (plants) or species/breed (animal) of the food be identified? | Yes   | <b>Please state the variety or breed</b> |
|                                                                                             | No    |                                          |
|                                                                                             | UD    |                                          |
|                                                                                             | NA    |                                          |

## Note FYI

- An example of variety/cultivar (plants) include Mango, Badami or Apple, Granny Smith or Apple, own country or Apple, imported or Apple, all varieties.
- An example of species/breed (animal) include Mjahim camel milk or Wadah camel milk or Safara camel milk.

## 1.12. MATURITY STAGE

Please choose one of the below input:

| MATURITY STAGE                           |       |                                 |
|------------------------------------------|-------|---------------------------------|
| Criteria                                 | Input | 1.12.1.Note                     |
| 1.12.1.Is it ripe or unripe, e.g. mango? | Yes   | <b>Please state the details</b> |
|                                          | No    |                                 |
|                                          | UD    |                                 |
|                                          | NA    |                                 |

| MATURITY STAGE                                       |       |                                 |
|------------------------------------------------------|-------|---------------------------------|
| Criteria                                             | Input | 1.12.2.Note                     |
| 1.12.2.Is it an immature or mature form, e.g. beans? | Yes   | <b>Please state the details</b> |
|                                                      | No    |                                 |
|                                                      | UD    |                                 |
|                                                      | NA    |                                 |

## 1.12. MATURITY STAGE

☐ Please choose one of the below input:

| MATURITY STAGE                                                                      |                                                                   |
|-------------------------------------------------------------------------------------|-------------------------------------------------------------------|
| Criteria                                                                            | Input                                                             |
| 1.12.3.What is the age of the animal, is it young or adult (e.g. veal versus beef)? | OPEN Q<br><b>Please state the details as stated in the study.</b> |

## 1.13. WILD vs. DOMESTICATED PLANTS and ANIMALS

☐ Please choose one of the below input:

| WILD vs. DOMESTICATED PLANTS and ANIMALS |       |                                 |
|------------------------------------------|-------|---------------------------------|
| Criteria                                 | Input | 1.13.Note                       |
| 1.13.Is it wild or domesticated?         | Yes   | <b>Please state the details</b> |
|                                          | No    |                                 |
|                                          | UD    |                                 |
|                                          | NA    |                                 |

## 1.14. PART/SOURCE OF THE FOOD

☐ Please choose one of the below input:

### PART/SOURCE OF THE FOOD

| Criteria                                           | Input                             | 1.14.1.Note                                             |
|----------------------------------------------------|-----------------------------------|---------------------------------------------------------|
| 1.14.1.Which part of the animal/plant is consumed? | <b>Specify from the drop list</b> | <b>If other, please state the name of inedible part</b> |

### Note FYI

- An example of the parts in the link: [Parts of plant](#)

- A. Vegetables
- B. Roots
- C. Stem
- D. Leaves
- E. Flowers
- F. Fruits
- G. Cereals
- H. Tea
- I. Coffee
- J. Oil
- K. Spices
- L. Milk
- M. Eggs
- N. Meat
- O. UD
- P. NA
- Q. Other

## 1.14. PART/SOURCE OF THE FOOD

☐ Please choose one of the below input:

### PART/SOURCE OF THE FOOD

| Criteria                                   | Input                      | 1.14.2.Note                                             |
|--------------------------------------------|----------------------------|---------------------------------------------------------|
| 1.14.2.Which meat/poultry cut is consumed? | Specify from the drop list | <b>If other, please state the name of inedible part</b> |

### Note FYI

- An example meat cut in the link: [Meat cut & Poultry Meat Cuts](#)

A. Breast  
 B. Wings  
 C. Legs  
 D. Whole chicken  
 E. Drumstick  
 F. Thigh  
 G. Neck  
 H. Feet  
 I. Gizzard  
 J. Liver  
 K. Heart  
 L. TENDERLOIN  
 M. TOP SIRLOIN  
 N. STRIP LOIN  
 O. RIB STEAK & RIB EYE  
 P. T-BONE  
 Q. BOTTOM SIRLOIN TRI-TIP

N. FLANK  
 O. BOTTOM SIRLOIN FLAP  
 P. HANGER  
 Q. SKIRT  
 R. UD  
 S. NA  
 T. Other

# 1.15. FORTIFICATION/ENRICHMENT OF PROCESSED FOOD

## FORTIFICATION AND SUPPLEMENTATION

Please choose one of the below input:

| FORTIFICATION/ENRICHMENT OF PROCESSED FOOD FORTIFICATION AND SUPPLEMENTATION |       |                                                         |
|------------------------------------------------------------------------------|-------|---------------------------------------------------------|
| Criteria                                                                     | Input | 1.15.1.Note                                             |
| 1.15.1.Is the food fortified/enriched?                                       | Yes   | <b>Please state what is the food fortified/enriched</b> |
|                                                                              | No    |                                                         |
|                                                                              | UD    |                                                         |

| FORTIFICATION/ENRICHMENT OF PROCESSED FOOD FORTIFICATION AND SUPPLEMENTATION |                                                                  |
|------------------------------------------------------------------------------|------------------------------------------------------------------|
| Criteria                                                                     | Input                                                            |
| 1.15.2.Which fortification/enrichment standards are used in the country?     | OPEN Q<br><b>Please state the details as stated in the study</b> |

# FORTIFICATION/ENRICHMENT OF PROCESSED FOOD FORTIFICATION AND SUPPLEMENTATION

Please choose one of the below input:

| FORTIFICATION/ENRICHMENT OF PROCESSED FOOD FORTIFICATION AND SUPPLEMENTATION                                                     |        |
|----------------------------------------------------------------------------------------------------------------------------------|--------|
| Criteria                                                                                                                         | Input  |
| 1.15.3.To which level are food components added?<br><u>E.g. 25 % of the recommended daily value or exact amount is provided.</u> | OPEN Q |

| FORTIFICATION/ENRICHMENT OF PROCESSED FOOD FORTIFICATION AND SUPPLEMENTATION               |      |                                                        |
|--------------------------------------------------------------------------------------------|------|--------------------------------------------------------|
| Criteria                                                                                   | Code | 1.15.4.NOTE                                            |
| 1.15.4.Is the food imported from a country where the food is generally fortified/enriched? | Yes  | <b>Please state the details as stated in the study</b> |
|                                                                                            | No   |                                                        |
|                                                                                            | UD   |                                                        |
|                                                                                            | NA   |                                                        |

# FORTIFICATION/ENRICHMENT OF PROCESSED FOOD FORTIFICATION AND SUPPLEMENTATION

Please choose one of the below input:

| FORTIFICATION/ENRICHMENT OF PROCESSED FOOD FORTIFICATION AND SUPPLEMENTATION   |       |                                 |
|--------------------------------------------------------------------------------|-------|---------------------------------|
| Criteria                                                                       | Input | 1.15.5.Note                     |
| 1.15.5.Does the food/dish contain an ingredient that maybe fortified/enriched? | Yes   | <b>Please state the details</b> |
|                                                                                | No    |                                 |
|                                                                                | UD    |                                 |
|                                                                                | NA    |                                 |

| FORTIFICATION/ENRICHMENT OF PROCESSED FOOD FORTIFICATION AND SUPPLEMENTATION                       |       |                                 |
|----------------------------------------------------------------------------------------------------|-------|---------------------------------|
| Criteria                                                                                           | Input | 1.15.6.Note                     |
| 1.15.6.Does the food/dish contain Reduction of components? (e.g. sodium, sugar for `light foods`)? | Yes   | <b>Please state the details</b> |
|                                                                                                    | No    |                                 |
|                                                                                                    | UD    |                                 |
|                                                                                                    | NA    |                                 |

## 1.16. RECIPES INFORMATION

❑ Please choose one of the below input:

| RECIPES INFORMATION                                                                       |        |
|-------------------------------------------------------------------------------------------|--------|
| Criteria                                                                                  | Input  |
| 1.16.1.Ingredient weight/ quantities in grams or household measurements in edible portion | OPEN Q |

| RECIPES INFORMATION                        |        |
|--------------------------------------------|--------|
| Criteria                                   | Input  |
| 1.16.2.Ingredient weight in edible portion | OPEN Q |

| RECIPES INFORMATION       |        |
|---------------------------|--------|
| Criteria                  | Input  |
| 1.16.3.Preparation method | OPEN Q |

# RECIPES INFORMATION

❑ Please choose one of the below input:

| RECIPES INFORMATION                                                      |        |
|--------------------------------------------------------------------------|--------|
| Criteria                                                                 | Input  |
| 1.16.4.What is the amount of <u>weight loss</u> or <u>yield factor</u> ? | OPEN Q |

| RECIPES INFORMATION                                                                     |        |
|-----------------------------------------------------------------------------------------|--------|
| Criteria                                                                                | Input  |
| 1.16.5.Any further information on density/ specific gravity, edible part/ refuse/ waste | OPEN Q |

| RECIPES INFORMATION              |                                   |                                           |
|----------------------------------|-----------------------------------|-------------------------------------------|
| Criteria                         | Input                             | 1.16.7.Note                               |
| 1.16.6.How is the dish analyzed? | <b>Specify from the drop list</b> | <b>If other, please state the details</b> |

- A. By each ingredient
- B. As a whole (by recipe)
- C. UD
- D. NA
- E. Other

# RECIPES INFORMATION

❑ Please choose one of the below input:

| RECIPES INFORMATION                                                                                                   |        |
|-----------------------------------------------------------------------------------------------------------------------|--------|
| Criteria                                                                                                              | Input  |
| 1.16.7.what are the applied <u>retention factors</u> ?<br><u>(If is not stated, please write “not stated” in 000)</u> | OPEN Q |

| RECIPES INFORMATION                                                                                                          |        |
|------------------------------------------------------------------------------------------------------------------------------|--------|
| Criteria                                                                                                                     | Input  |
| 1.16.8.what is the applied <u>recipe calculation method</u> ?<br><u>(If is not stated, please write “not stated” in 000)</u> | OPEN Q |

# 2. Component Identification

2.1. COMPONENT DEFINITION

2.2. VALUE

2.3. UNIT

2.4. DENOMINATOR

2.5. EXPRESSION

## 2.1. COMPONENT DEFINITION

❑ Please state the full component definition as stated in the study.

| COMPONENT DEFINITION     |        |
|--------------------------|--------|
| Criteria                 | Input  |
| 2.1.Component definition | OPEN Q |

### Note

- Please, write the full definition of the component exactly as stated in the study, for example: calcium, vitamin C as sum of ascorbic acid and dehydroascorbic acid, etc.

## 2.2. VALUE

❑ Please state the value of the component

| VALUE       |                                      |
|-------------|--------------------------------------|
| Criteria    | Input                                |
| 2.2.1.Value | OPEN Q<br><u>(NUMBER INPUT ONLY)</u> |

### Note

- Please, write the value complete as stated in the study with the every decimal (e.g. 0.376453) and avoid decimal approximation (e.g. 0.4 or 0.38).

# VALUE

❑ Please state the value type

| VALUE TYPE       |                                                |                                    |
|------------------|------------------------------------------------|------------------------------------|
| Criteria         | Input                                          | Note                               |
| 2.2.2.Value type | Specify from the drop list                     | If other, please state the details |
|                  | Drop list of the value types are in next slide |                                    |

## Note

Please be aware that some studies may state words such as “Trace” or “Not Detected” for value of the nutrients, you need to write:

- Tr = Trace
- ND = Not Detected

- In note, please state the details for the value type as stated in the study. For example:

- Under limit of quantification
- Under limit of detection
- Half of limit of quantification
- Half limit of detection

## Drop list of value types:

|                               |
|-------------------------------|
| <b>Value &gt; (more than)</b> |
| <b>Value &lt; (less than)</b> |
| <b>Trace (Tr)</b>             |
| <b>Non Detected (ND)</b>      |
| <b>Mean</b>                   |
| <b>Median</b>                 |
| <b>Mode</b>                   |
| <b>Other</b>                  |

## 2.3. UNITS

☐ Please choose one of the below Input:

| UNITS     |                            |                                                                              |
|-----------|----------------------------|------------------------------------------------------------------------------|
| Criteria  | Input                      | 2.3.NOTE                                                                     |
| 2.3.Units | Specify from the drop list | If other, Please state unit not from the list and any additional information |

Drop list of units are in next slide

### Note

**FYI** Units: quantify the amount of a component, standardized for each component (e.g. gram, milligram and microgram)

- Please, be aware of the other column to make sure about making the correct food component
- If the unit not find in the drop list, please:
  1. Choose “other” from the list
  2. State the unit in “NOTE” column

## Drop list of units:

|                                 |
|---------------------------------|
| <b>kg (Kilogram)</b>            |
| <b>g or gm (gram)</b>           |
| <b>µg or mcg (microgram)</b>    |
| <b>mg (milligram)</b>           |
| <b>ng (nanogram)</b>            |
| <b>pg (picogram)</b>            |
| <b>Bq (Becquerel)</b>           |
| <b>L (Liter)</b>                |
| <b>mL (milliliter)</b>          |
| <b>µL (microliter)</b>          |
| <b>mmol (millimol)</b>          |
| <b>MJ (megajoules)</b>          |
| <b>kJ (kilojoule)</b>           |
| <b>kcal (kilocalorie)</b>       |
| <b>% (percent)</b>              |
| <b>ppb (parts per billion)</b>  |
| <b>ppm (parts per million)</b>  |
| <b>IU (international units)</b> |
| <b>0:0 (Ratio)</b>              |
| <b>other</b>                    |

## 2.4. DENOMINATORS

☐ Please choose one of the below Input:

| DENOMINATORS     |                            |                                                                                      |
|------------------|----------------------------|--------------------------------------------------------------------------------------|
| Criteria         | Input                      | 2.4.NOTE                                                                             |
| 2.4.Denominators | Specify from the drop list | If other, Please state denominators not from the list and any additional information |

Drop list of Denominators are in next slide

### Note FYI

- Denominators: indicates in which food quantify the component can be found.
- Normally, in a FCT/FCDB "per 100 g edible portion on fresh weight basis" is used for foods and beverages.
- It is also called matrix unit or bases of expression.
- If the denominators not find in the drop list, please:
  1. Choose "other" from the list
  2. State the denominators in "NOTE" column

# Drop list of Denominators:

|                                                             |                                                                    |                                                                                    |
|-------------------------------------------------------------|--------------------------------------------------------------------|------------------------------------------------------------------------------------|
| per g total nitrogen                                        | per g total fatty acids                                            | per 100 g edible portion                                                           |
| per 100 g nitrogen                                          | per 100 g total fatty acids                                        | per kg edible portion                                                              |
| per 100 g total amino acid                                  | per g fat as triglyceride equivalent                               | per 100 g total food                                                               |
| per 100 g protein                                           | per 100 g fat as triglyceride equivalent                           | per kg total food                                                                  |
| Per g total protein of edible portion on fresh weight basis | per g total fat                                                    | per 100 g total food (edible and inedible parts of the food) on fresh weight basis |
| Per g total protein of edible portion on dry weight basis   | per 100 g total fat                                                | per 100 g total food (edible and inedible parts of the food) on fresh dry basis    |
|                                                             | Per g total lipid of edible portion on fresh weight basis          | per 100 g dry weight                                                               |
|                                                             | Per g total lipid of edible portion on dry weight basis            | per 100 g dry matter of edible food                                                |
|                                                             | Per g total lipid (edible and inedible food) on fresh weight basis | per kg dry weight                                                                  |
|                                                             |                                                                    | per L food volume                                                                  |
|                                                             |                                                                    | per 100 mL food volume                                                             |
|                                                             |                                                                    | Other                                                                              |

# EXAMPLES OF UNITS AND DENOMINATORS STATED TOGETHER:

| <u>Unit</u>                                                                                                                                              | <u>“per” or “/”</u>                                                                                                                                                                                                                                        | <u>of</u>                                                                                                                                                                                                                                                                                                                | <u>on</u>                                                                                                                                                                                              |
|----------------------------------------------------------------------------------------------------------------------------------------------------------|------------------------------------------------------------------------------------------------------------------------------------------------------------------------------------------------------------------------------------------------------------|--------------------------------------------------------------------------------------------------------------------------------------------------------------------------------------------------------------------------------------------------------------------------------------------------------------------------|--------------------------------------------------------------------------------------------------------------------------------------------------------------------------------------------------------|
| <ul style="list-style-type: none"> <li>• Kg</li> <li>• mg</li> <li>• mcg</li> <li>• G</li> <li>• L</li> <li>• %</li> <li>• kcal</li> <li>• IU</li> </ul> | <ul style="list-style-type: none"> <li>• <b>per</b> 100 g</li> <li>• <b>per</b> g total lipid</li> <li>• <b>per</b> 100 g edible portion</li> <li>• <b>per</b> L food volume</li> <li>• mg/L</li> <li>• µg/100g</li> <li>• mg/g</li> <li>• g/kg</li> </ul> | <ul style="list-style-type: none"> <li>• <b>of</b> total food (edible and inedible parts of the food)</li> <li>• <b>of</b> fatty acids</li> <li>• <b>of</b> total triglycerides of protein</li> <li>• <b>of</b> nitrogen</li> <li>• <b>of</b> seed flour</li> <li>• <b>of</b> Non-Starch Polysaccharide (NSP)</li> </ul> | <ul style="list-style-type: none"> <li>• <b>on</b> fresh weight basis</li> <li>• <b>on</b> dry weight basis</li> <li>• <u>OR</u> dry matter basis</li> <li>• <u>OR</u> per 100 g dry matter</li> </ul> |

**Unit**

**Denominator**

## 2.5. EXPRESSION

☐ Please choose one of the below Input:

| EXPRESSION     |        |
|----------------|--------|
| Criteria       | Input  |
| 2.5.Expression | OPEN Q |

### Note FYI

- **The information about expression could be found in the full definition of the component**, For example:
  - Carbohydrates available: expressed in monosaccharide equivalents, by weight, in anhydrous form.
  - Total vitamin A activity expressed in mcg retinol activity equivalent (RAE) OR expressed in mcg retinol equivalent (RE).

# **3. Quality Determination**

**3.1. SOURCE TYPES**

**3.2. ANALYTICAL ASSURANCE**

**3.3. LEVEL OF CONFIDENCE**

## 3.1. SOURCE TYPES

Please choose one of the below Input:

| 3.1.SOURCE TYPES                                               |       |
|----------------------------------------------------------------|-------|
| Criteria                                                       | Input |
| Analyzed                                                       | 60    |
| Calculated                                                     | 50    |
| Imputed                                                        | 40    |
| Calculated recipe                                              | 30    |
| Borrowed from other source                                     | 20    |
| Presumed according to standard rules or Presumed as zero value | 10    |
| Not determined (Estimated or Guessed)                          | 0     |

# If The Previous choice is → ANALYZED

## 3.1.1.IF ANALYZED

| Criteria                | Input  |
|-------------------------|--------|
| 3.1.1.Analytical method | OPEN Q |

### Note FYI

#### Examples of analytical method statement:

- Determined by acid detergent method
- Determined gravimetrically by the AOAC total dietary fiber method
- Determined by bioassay
- Determined by microbiological assay
- Determined by HPLC
- The analytical method is a mixed solvent extraction
- Determination via Kjeldahl, mixed methods
- Derived by analysis using continuous extraction
- According to the AOAC standard method

## If The Previous choice is → CALCULATED

### 3.1.2.IF CALCULATED

| Criteria                                      | Input  |
|-----------------------------------------------|--------|
| 3.1.2.1.Calculation method                    | OPEN Q |
| 3.1.2.2.Conversion factors, <u>if applied</u> | OPEN Q |

### Note FYI

- **Calculated value** is the nutrient values that calculated for recipes based on Nutrient content of the ingredients and Preparation factors which are, yield factor and nutrient retention factors, or for specific energy values.

### Examples of calculation method statement:

- calculated from total nitrogen
- calculated by summation of the vitamin A activities of retinol and the active carotenoids
- calculated as sum of hydrous amino acids (including water)
- calculated from the energy-producing food components

- **For Conversion factors please back to the A5.**

## If The Previous choice is → IMPUTED

### 3.1.3.IF IMPUTED

| Criteria                               | Input                                                                                         |
|----------------------------------------|-----------------------------------------------------------------------------------------------|
| 3.1.3.Imputation and adjustment method | <p><b>OPEN Q</b></p> <p><b>please state the Imputation and adjusting method if stated</b></p> |

### Note **FYI**

- **Imputed values** is the values that estimates derived from analytical data available for similar foods and may also be derived by calculation from incomplete or partial analyses of a food.

For example:

- the calcium content available in white beans but not in black beans
- adjusting moisture content from dry to fresh
- carbohydrate or moisture by difference
- sodium derived from chloride values
- chloride calculated from the value for sodium

# If The Previous choice is → CALCULATED RECIPE – YIELD FACTOR

## 3.1.4.1.IF CALCULATED RECIPE – YIELD FACTOR

| Criteria                                                                           | Input                                                                                                                                            |
|------------------------------------------------------------------------------------|--------------------------------------------------------------------------------------------------------------------------------------------------|
| 3.1.4.1.1 Wight of total raw ingredients                                           | <b>OPEN Q</b><br>please state the weight of each ingredient per g (eg. Camel meat= 680g, water=30g, .....etc. and total ingredients weight= 45g) |
| 3.1.4.1.2 Total weight for the whole recipe (as cooked, prepared, or ready to eat) | <b>OPEN Q</b><br>please state the weight whole recipe per g                                                                                      |
| 3.1.4.1.3 The yield factor for the whole recipe                                    | <b>OPEN Q</b><br>please state the yield factor for whole recipe per g                                                                            |

# If The Previous choice is → CALCULATED RECIPE – NUTRIENT RETENTION FACTOR

## 3.1.4.2.IF CALCULATED RECIPE – NUTRIENT RETENTION FACTOR

| Criteria                                                                           | Input                                                                                                                                                           |
|------------------------------------------------------------------------------------|-----------------------------------------------------------------------------------------------------------------------------------------------------------------|
| 3.1.4.2.1 Nutrient content per raw ingredients                                     | <b>OPEN Q</b><br>please state the nutrient content for each raw ingredients in g (eg. Camel meat= 680g, water=30g, .....etc. and total ingredients weight= 45g) |
| 3.1.4.2.2 Nutrient content per whole recipe (as cooked, prepared, or ready to eat) | <b>OPEN Q</b><br>please state the nutrient content for whole recipe in 100g                                                                                     |

# If The Previous choice is → BORROWED FROM OTHER SOURCE

| 3.1.5.IF BORROWED FROM OTHER SOURCE |                                                                                                                             |
|-------------------------------------|-----------------------------------------------------------------------------------------------------------------------------|
| Criteria                            | Input                                                                                                                       |
| 3.1.5.Data source                   | <b>OPEN Q</b><br>please state the reference or the source of the values, usually found in the <u>literature review part</u> |

## Note FYI

- **Borrowed values** is the nutrient values that taken from other FCTs/FCDBs, For example: international Experience, Expertise, Standards guidelines and tools.

## If The Previous choice is → PRESUMED ACCORDING TO STANDARD RULES OR PRESUMED AS ZERO VALUE

### 3.1.6.IF PRESUMED ACCORDING TO STANDARD RULES OR PRESUMED AS ZERO

| Criteria                | Input                                                      |
|-------------------------|------------------------------------------------------------|
| 3.1.6.The standard role | OPEN Q<br>please state the standard role, <u>if stated</u> |

### Note FYI

- **Presumed values** is the nutrient values that can be assumed as being Zero according to current general knowledge, For example: plant food has No cholesterol.

## 3.2. ANALYTICAL ASSURANCE

❑ Please note that this will fill just in case if the source type was analyze

### 3.2.1.NAME OF LABORATORY

| Criteria                 | Input                                                                                                   |
|--------------------------|---------------------------------------------------------------------------------------------------------|
| 3.2.1.Name of laboratory | <p>OPEN Q</p> <p>please state the name of laboratory as stated if found and Write 'UD' if Undefined</p> |

### 3.2.2.ANALYTICAL ASSURANCE

| Criteria                                                                                   | Input |
|--------------------------------------------------------------------------------------------|-------|
| Analyzed with an internationally recognized method, a quality assurance system was applied | 40    |
| Analyzed with un-internationally <b><u>recognized</u></b> method                           | 30    |
| Analyzed with an internationally <b><u>unrecognized</u></b> method                         | 20    |
| Analyzed <b><u>without</u></b> a clearly stated method                                     | 10    |

## 3.3. LEVEL OF CONFEDENCE

❑ Please note that this requirement will be auto-calculated in the Excel tool.

| 3.3.LEVEL OF CONFEDENCE |       |
|-------------------------|-------|
| Criteria                | Input |
| High confidence         | H     |
| Good confidence         | G     |
| Medium confidence       | M     |
| Low confidence          | L     |
| No confidence           | N     |
