# Supplementary material
Source: Research Square preprint supplement (doi:10.21203/rs.3.rs-9437605/v1)
Supplement: Supplementary file 2 [file 91317871a83365a5f3abe639.pdf]

**Saudi Food Composition Database (SFCD) Food Group, Sub-group  
and Sub-sub-group**

| #  | Food Group                            | code |
|----|---------------------------------------|------|
| 1  | Cereals and cereal products           | A    |
| 2  | Milk and milk products                | B    |
| 3  | Eggs                                  | C    |
| 4  | Vegetables                            | D    |
| 5  | Fruit                                 | F    |
| 6  | Pulses, nuts and seeds                | G    |
| 7  | Herbs, spices, and Condiments         | H    |
| 8  | Fish and fish products                | J    |
| 9  | Meat and meat products                | M    |
| 10 | Fats and oils                         | O    |
| 11 | Beverages                             | P    |
| 12 | Sweets and Sugars                     | S    |
| 13 | Foods for particular nutritional uses | R    |
| 14 | Food supplements and similar          | U    |
| 15 | Food additives                        | V    |
| 16 | Composite dishes                      | T    |
| 17 | Savory snacks                         | K    |

| # | Food Group                  | CODE | New Sub-group Modification | New Sub-sub-group Modification | Invented New General Code | Invented New SFCD Code | Note (Definition)                                                                                                                                                                                                                                                                                                                                                                      |
|---|-----------------------------|------|----------------------------|--------------------------------|---------------------------|------------------------|----------------------------------------------------------------------------------------------------------------------------------------------------------------------------------------------------------------------------------------------------------------------------------------------------------------------------------------------------------------------------------------|
| 1 | Cereals and cereal products | A    | Rice                       |                                | AA                        | SAA                    | <p><b>Including:</b> secondary commodities and derived products from rice such as semolina, flour, bran, popped rice, rolled grains and porridge, and manufactured rice-based products such as processed rice-based flakes, noodles, bread and imitation milk.</p> <p><b>Excluding:</b> manufactured rice-based snacks such as chips.</p>                                              |
|   |                             |      | Maize                      |                                | AB                        | SAB                    | <p><b>Including:</b> secondary commodities and derived products from maize such as semolina, milled grain, maize germ and cornmeal porridge, and manufactured maize-based products such as processed maize-based flakes, maize starch and popcorn.</p> <p><b>Excluding:</b> manufactured maize-based snacks such as chips.</p>                                                         |
|   |                             |      | Wheat                      |                                | AC                        | SAC                    | <p><b>Including:</b> secondary commodities and derived products from wheat such as groats, semolina, flour, bran, wheat grain germ, rolled and popped grains and porridge, and manufactured wheat-based products such as processed wheat-based flakes, puffed grains, pastas, breads and dough-based foods</p> <p><b>Excluding:</b> manufactured wheat-based snacks such as chips.</p> |
|   |                             |      | Sorghum                    |                                | AD                        | SAD                    | <p><b>Including:</b> secondary commodities and derived products from sorghum such as flour, and manufactured sorghum-based products.</p> <p><b>Excluding:</b> manufactured sorghum-based snacks such as chips.</p>                                                                                                                                                                     |

|                     |  |    |     |                                                                                                                                                                                                                                           |
|---------------------|--|----|-----|-------------------------------------------------------------------------------------------------------------------------------------------------------------------------------------------------------------------------------------------|
| Millet              |  | AB | SAB | <p><b>Including:</b> secondary commodities and derived products from millet such as groats, flour and rolled grains, and manufactured millet-based products.</p> <p><b>Excluding:</b> manufactured millet-based snacks such as chips.</p> |
| Rye                 |  | AE | SAE | <p><b>Including:</b> secondary commodities and derived products from rye such as flour, and manufactured rye-based products.</p> <p><b>Excluding:</b> manufactured rye-based snacks such as chips.</p>                                    |
| Barley              |  | AF | SAF | <p><b>Including:</b> secondary commodities and derived products from barley such as flour, and manufactured barley-based products.</p> <p><b>Excluding:</b> manufactured barley-based snacks such as chips.</p>                           |
| Buckwheat           |  | AG | SAG | <p><b>Including:</b> secondary commodities and derived products from buckwheat such as flour, and manufactured buckwheat-based products.</p> <p><b>Excluding:</b> manufactured buckwheat-based snacks such as chips.</p>                  |
| Oat                 |  | AH | SAH | <p><b>Including:</b> secondary commodities and derived products from oat such as flour, and manufactured oat-based products.</p> <p><b>Excluding:</b> manufactured oat-based snacks such as chips.</p>                                    |
| Breakfast cereals   |  | AI | SAI | <p><b>Including:</b> any breakfast cereal that made by any type of grains.</p> <p><b>Excluding:</b> infant cereal foods (young from birth to 12 months).</p>                                                                              |
| Infant cereal foods |  | AJ | SAJ | <p><b>Including:</b> any cereal foods that used and target infants (young from birth to 12 months).</p> <p><b>Excluding:</b> any breakfast cereal for adult.</p>                                                                          |

|   |                        |   |               |                   |     |      |                                                                                                                                                                                                                                                                                                                                                                                                                                                                                                                               |
|---|------------------------|---|---------------|-------------------|-----|------|-------------------------------------------------------------------------------------------------------------------------------------------------------------------------------------------------------------------------------------------------------------------------------------------------------------------------------------------------------------------------------------------------------------------------------------------------------------------------------------------------------------------------------|
|   |                        |   | Other cereals |                   | AK  | SAK  | <p><b>Including:</b> grains other than rice, wheat, sorghum, millet, rye, barley, buckwheat, oat, and unspecified grains, including their secondary commodities and derived products such as groats, flours, brans, flakes, popped cereals, rolled grains, porridges and others, and manufactured cereal-based products such as cereal bars, muesli, industrial ready-to-eat porridges, pastas and noodles, breads, starches and imitation milk.</p> <p><b>Excluding:</b> manufactured cereal-based snacks such as chips.</p> |
| 2 | Milk and milk products | B | Cow's milk    |                   | BA  | SBA  | <p><b>Including:</b> fresh cow milk only with or without flavor.</p> <p><b>Excluding:</b> any fermented products such as cream, whey, cheese or other products made from cow milk.</p>                                                                                                                                                                                                                                                                                                                                        |
|   |                        |   |               | Whole milk        | BAA | SBAA | <b>Including:</b> milk have at least 3.5 % fat.                                                                                                                                                                                                                                                                                                                                                                                                                                                                               |
|   |                        |   |               | Semi-skimmed milk | BAB | SBAB | <p><b>Including:</b> milk have 1.5 – 1.8 % fat.</p> <p><b>Note:</b> both semi-skimmed and skimmed milk can be referred to as 'low-fat' milk</p>                                                                                                                                                                                                                                                                                                                                                                               |
|   |                        |   |               | Skimmed milk      | BAC | SBAC | <p><b>Including:</b> milk have no more than 0.5 % fat.</p> <p>Note: both semi-skimmed and skimmed milk can be referred to as 'low-fat' milk</p>                                                                                                                                                                                                                                                                                                                                                                               |
|   |                        |   |               | Processed milks   | BAD | SBAD | <p><b>Including:</b> concentrated and easily transportable dairy products with long shelf lives that made from cow milk such as powder.</p> <p><b>Excluding:</b> cheese, butter, and ghee that made from cow milk.</p>                                                                                                                                                                                                                                                                                                        |
|   |                        |   | Camel milk    |                   | BB  | SBB  | <p><b>Including:</b> fresh camel milk only with or without flavor.</p> <p><b>Excluding:</b> any fermented products such as cream, whey, cheese or other products made from camel milk.</p>                                                                                                                                                                                                                                                                                                                                    |
|   |                        |   |               | Whole milk        | BBA | SBBA | <b>Including:</b> milk have at least 2.5 % fat.                                                                                                                                                                                                                                                                                                                                                                                                                                                                               |

|                          |                           |     |      |                                                                                                                                                                                                                            |
|--------------------------|---------------------------|-----|------|----------------------------------------------------------------------------------------------------------------------------------------------------------------------------------------------------------------------------|
|                          | Semi-skimmed milk         | BBB | SBBB | <b>Including:</b> milk have 1 – 2 % fat.                                                                                                                                                                                   |
|                          | Skimmed milk              | BBC | SBBC | <b>Including:</b> milk have no more than 0.5 % fat.                                                                                                                                                                        |
|                          | Processed milks           | BBD | SBBD | <b>Including:</b> concentrated and easily transportable dairy products with long shelf lives that made from camel milk such as powder.<br><b>Excluding:</b> cheese, butter, and ghee that made from camel milk.            |
| Other milks              |                           | BC  | SBC  | <b>Including:</b> milks from other sources than, fermented, non-dairy such as goat, sheep, or human sources.<br><b>Excluding:</b> milks from cow, camel, fermented, non-dairy sources.                                     |
| Fermented milks products |                           | BD  | SBD  | <b>Including:</b> fermented products from the milk of cows, sheep, goats or other mammals, such as kefir, koumiss, and sour and fermented milk, including flavored and non-flavored products.<br><b>Excluding:</b> yogurts |
| Non-dairy milks          |                           | BE  | SBE  | <b>Including:</b> any milks from other source than animal (ex: plant sources) such as oat, almond, pea, cashew and others.<br><b>Excluding:</b> animal milks.                                                              |
| Infant formulas          |                           | BF  | SBF  | <b>Including:</b> any infant formula used for young from birth to 12 months.<br><b>Excluding:</b> any formula used for 1 years old and older such as powder milk for adults.                                               |
|                          | Whey-based modified milks | BFA | SBFA | <b>Including:</b> partially hydrolyzed whey protein-based infant formula.<br><b>Excluding:</b> non-whey-based modified milks, Soya-based modified milks, and Follow-on formulas.                                           |

|  |                               |     |      |                                                                                                                                                                                                                                                                 |
|--|-------------------------------|-----|------|-----------------------------------------------------------------------------------------------------------------------------------------------------------------------------------------------------------------------------------------------------------------|
|  | Non-whey-based modified milks | BFB | SBFB | <p><b>Including:</b> any plant-based milk.</p> <p><b>Excluding:</b> whey-based modified milks, Soya-based modified milks, and Follow-on formulas.</p>                                                                                                           |
|  | Soya-based modified milks     | BFC | SBFC | <p><b>Including:</b> any plant-based drink produced by soaking and grinding soybeans, boiling the mixture, and filtering out remaining particulates.</p> <p><b>Excluding:</b> whey-based modified milks, Soya-based modified milks, and Follow-on formulas.</p> |
|  | Follow-on formulas            | BFD | SBFD | <p><b>Including:</b> any formula that fed for babies above 6 months old and never fed for under.</p> <p><b>Excluding:</b> formula fed for babies under 6 months old.</p>                                                                                        |
|  | Milk-based drinks             | BG  | SBG  | <p><b>Including:</b> all drinks that contain milk such as: banana milk smoothie, fruit milkshake, and other.</p> <p><b>Excluding:</b> drinks that contain only milk which consider as a liquid milk.</p>                                                        |
|  | Cheeses                       | BH  | SBH  | <p><b>Including:</b> any kinds of cheese manufactured from the milk of cows, sheep, goats or other mammals, such as cured and uncured cheese, brined cheese, ripened cheese (soft and hard), including cheese rind and processed cheese such as spreads.</p>    |
|  | Non-dairy cheese              |     | SBI  | <p><b>Including:</b> products gives the same look and feels like cheese and used quite often in the replacement of cheese such as cheese analogue.</p> <p><b>Excluding:</b> any -dairy cheese.</p>                                                              |
|  | Creams                        | BI  | SBI  | <p><b>Including:</b> any cream, higher-fat buttery layer with more fat compared to milk has a fat content &gt;30% such as heavy cream, whipping cream, full cream sweetened condensed milk, and labneh.</p>                                                     |

|            |                             |     |      |                                                                                                                                                                                                                                                                                                                                                                                            |
|------------|-----------------------------|-----|------|--------------------------------------------------------------------------------------------------------------------------------------------------------------------------------------------------------------------------------------------------------------------------------------------------------------------------------------------------------------------------------------------|
|            | Fresh creams (pasteurized)  | BIA | SBIA | <p><b>Including:</b> the full-fat fresh cream has a fat content of about 25%, liquid and light, which has not been inoculated and is simply pasteurized and cannot be whipped and shaped for decorative purposes such as cream used to thicken coffee as well as savory foods such as soups and gravies and cooking cream.</p> <p><b>Excluding:</b> frozen cream and non-dairy creams.</p> |
|            | Frozen creams (pasteurized) | BIB | SBIB | <p><b>Including:</b> all-natural cream made from pasteurized milk, fast-frozen to lock in fresh and creamy flavor.</p> <p><b>Excluding:</b> fresh cream and non-dairy creams.</p>                                                                                                                                                                                                          |
|            | Non-dairy creams            |     | SBIC | <p><b>Including:</b> products gives the same look and feels like fresh cream and used quite often in the replacement of fresh cream such as non-dairy whip topping, or cream analogue.</p> <p><b>Excluding:</b> any -dairy creams (fresh or frozen).</p>                                                                                                                                   |
| Yogurts    |                             | BJ  | SBJ  | <p><b>Including:</b> any yogurts with or without flavor that produced by bacterial fermentation of milk.</p>                                                                                                                                                                                                                                                                               |
|            | Whole fat yogurts           | BJA | SBJA | <p><b>Including:</b> yogurt contains fat reach to 8g per 100g.</p> <p><b>Excluding:</b> low fat yogurts and other yogurts</p>                                                                                                                                                                                                                                                              |
|            | Low fat yogurts             | BJB | SBJB | <p><b>Including:</b> yogurt contains less than 3g of fat per 100g.</p> <p><b>Excluding:</b> whole milk yogurts, all low fat other than regular yogurts.</p>                                                                                                                                                                                                                                |
|            | Other yogurts               | BJC | SBJC | <p><b>Including:</b> any other type of yogurt other than the regular such as: Greek, fresh, lactose-free, dairy-free yogurts and other.</p> <p><b>Excluding:</b> regular yogurts.</p>                                                                                                                                                                                                      |
| Ice creams |                             | BK  | SBK  | <p><b>Including:</b> all types of ice cream that include milk or animal products.</p> <p><b>Excluding:</b> vegan ice cream.</p>                                                                                                                                                                                                                                                            |
|            | Vegan ice cream             | BKA | SBKA | <p><b>Including:</b> all types of ice cream made without adding dairy or animal products.</p>                                                                                                                                                                                                                                                                                              |

|   |            |   |                               |    |     |                                                                                                                                                                                                                                                                                                                                                                                                                                                                                                                                                                                             |
|---|------------|---|-------------------------------|----|-----|---------------------------------------------------------------------------------------------------------------------------------------------------------------------------------------------------------------------------------------------------------------------------------------------------------------------------------------------------------------------------------------------------------------------------------------------------------------------------------------------------------------------------------------------------------------------------------------------|
|   |            |   |                               |    |     | <b>Excluding:</b> ice cream that include milk or animal products.                                                                                                                                                                                                                                                                                                                                                                                                                                                                                                                           |
|   |            |   | Puddings and chilled desserts | BL | SBL | <b>Including:</b> pudding and milk to produce products such as mousse, whipped cream, flan, crème brulee, custard, cheesecake, cream pie, tiramisu and other.<br><b>Excluding:</b> ice cream, vegan ice cream, chilled yogurts, and other.                                                                                                                                                                                                                                                                                                                                                  |
| 3 | Eggs       | C | Eggs                          | CA | SCA | <b>Including:</b> Bird eggs (whole and their fractions: separated yolk or white) such as from poultry (hen, duck, goose, quail, turkey, etc.) and other birds (seagull, emu, nandu, ostrich, etc.), including processed eggs such as dried eggs and manufactured products such as solid egg rolls.                                                                                                                                                                                                                                                                                          |
| 4 | Vegetables | D | Leafy vegetables              | DA | SDA | <b>Including:</b> vegetables such as lettuce, rocket salad, mustard leaves, bay leaves, spinach and similar, chard and similar, whitlow grass, cabbage and Brussels sprouts, kale, other leafy brassica and ferns, and seaweeds such as algae and prokaryote organisms, consumed fresh and after basic household processing such as cooking.<br><b>Excluding:</b> any starchy and sugary roots and tubers or drying, pickling, processed, drinks, and other ways of preserving vegetables.                                                                                                  |
|   |            |   | Other vegetables              | DB | SDB | <b>Including:</b> Non-leafy vegetables such as sprouts, shoots, flowering brassica (broccoli, cauliflower and similar), bulb vegetables (fresh garlic, onion and similar), stems and stalks eaten as vegetables (asparagus, leek, bamboo, palm heart and similar), fresh legume seeds also eaten with pods, flowers used as vegetables, fruiting vegetables (okra, cucumber, tomato and similar), roots, legume sprouts, starchy roots and tubers included in the “Roots, tubers and plantains” such as carrot, radish, and tubers, fungi, and mosses and lichens, consumed fresh and after |

|   |       |   |                      |  |    |                                                                                                                                                                                                                                                                                                                                                                                                                                                     |
|---|-------|---|----------------------|--|----|-----------------------------------------------------------------------------------------------------------------------------------------------------------------------------------------------------------------------------------------------------------------------------------------------------------------------------------------------------------------------------------------------------------------------------------------------------|
|   |       |   |                      |  |    | basic household processing such as cooking.<br><b>Excluding:</b> any leafy, drying, pickling, processed, drinks and other ways of preserving vegetables.                                                                                                                                                                                                                                                                                            |
|   |       |   | Dried vegetables     |  | DC | SDC<br><b>Including:</b> dried leafy vegetables and other vegetables, including sun-dried and industrially dried vegetables.<br><b>Excluding:</b> any leafy or other vegetables consumed fresh and after basic household processing such as cooking.                                                                                                                                                                                                |
|   |       |   | Processed vegetables |  | DD | SDD<br><b>Including:</b> processed leafy and other vegetables, including canned and jarred vegetables, concentrates such as tomato concentrate, pickled, salted, marinated and fermented vegetables, manufactured vegetable products such as vegetable pastes, and imitation dairy and meat.<br><b>Excluding:</b> dried leafy and other vegetables, starchy and sugary roots and tubers, imitation soy-based dairy and meat, and vegetables juices. |
|   |       |   | Vegetables drinks    |  | DE | SDE<br><b>Including:</b> any fresh vegetable juices.                                                                                                                                                                                                                                                                                                                                                                                                |
| 5 | Fruit | F | Fresh fruit          |  | FA | SFA<br><b>Including:</b> fruits such as citrus fruits (oranges, limes and similar), pome fruits (apples, quinces, loquats and others), stone fruits (apricots, cherries and similar), berries and small fruits (grapes, strawberries and similar), and other fruits (table olives, figs, litchis, etc.), consumed fresh and after basic household processing such as cooking.<br><b>Excluding:</b> dayes and any drying, pickling, candying, etc.   |
|   |       |   | Dried fruit          |  | FB | SFB<br><b>Including:</b> dried fruits of any kind, including sun-dried and industrially dried.<br><b>Excluding:</b> dates and any candied fruits.                                                                                                                                                                                                                                                                                                   |

|   |                        |   |                 |                |    |      |                                                                                                                                                                                                                                                                                                                                                               |
|---|------------------------|---|-----------------|----------------|----|------|---------------------------------------------------------------------------------------------------------------------------------------------------------------------------------------------------------------------------------------------------------------------------------------------------------------------------------------------------------------|
| 6 |                        |   | Processed fruit |                | FC | SFC  | <b>Including:</b> processed fruits, including canned and jarred, pickled, preserved in vinegar brine, etc.<br><b>Excluding:</b> dates and any dried, candied and fermented fruits.                                                                                                                                                                            |
|   |                        |   | Fruit drinks    |                | FD | SFD  | <b>Including:</b> any fresh fruit juices.<br><b>Excluding:</b> dates                                                                                                                                                                                                                                                                                          |
|   |                        |   | Fresh dates     |                |    | SFE  | <b>Including:</b> any type of fresh date.<br><b>Excluding:</b> dried or processed dates.                                                                                                                                                                                                                                                                      |
|   |                        |   |                 | Dried date     |    | SFEA | <b>Including:</b> any type of dried date.<br><b>Excluding:</b> fresh and processed dates.                                                                                                                                                                                                                                                                     |
|   |                        |   |                 | Processed date |    | SFEB | <b>Including:</b> any type of processed products of date such as ice cream, syrup, bar, mamuol, sugar, paste or spread product.<br><b>Excluding:</b> fresh and dried dates.                                                                                                                                                                                   |
|   | Pulses, nuts and seeds | G | Pulses          |                | GA | SGA  | <b>Including:</b> dry beans, peas, lentils, lupins and other or unspecified pulses and their sprouts, including derived and manufactured products such as canned or jarred legumes and hummus.<br><b>Excluding:</b> soybeans                                                                                                                                  |
|   |                        |   | Soybeans        |                | GB | SGB  | <b>Including:</b> dry soybeans and their sprouts, including derived and manufactured products such as tofu, soy drinks, texturized soy proteins, imitation meats, and imitation milk and milk products.                                                                                                                                                       |
|   |                        |   | Nuts and seeds  |                | GC | SGC  | <b>Including:</b> nuts and seeds such as tree nuts (almonds, cashew nuts, chestnuts, coconuts, walnuts and similar, etc.) and oilseeds (sesame seeds, poppy seeds, sunflower seeds, pumpkin seeds, linseeds, etc.), including their derived and manufactured products such as dried nuts, flours and powders, peanut butter, tahini paste and imitation milk. |

|   |                               |   |                  |  |    |     |                                                                                                                                                                                                                                                                                     |
|---|-------------------------------|---|------------------|--|----|-----|-------------------------------------------------------------------------------------------------------------------------------------------------------------------------------------------------------------------------------------------------------------------------------------|
| 7 | Herbs, spices, and Condiments | H | Herbs and spices |  | HA | SHA | <b>Including:</b> herbs, such as aromatic and dried herbs and flowers used as spices, etc., and spices such as buds, seeds, fruit, root and rhizome spices, etc.                                                                                                                    |
|   |                               |   | Condiments       |  | HB | SHB | <b>Including:</b> condiments, sauces and relishes such as soy sauce, mayonnaise, seasoning mixes, flavor extracts, vinegars, salsas, pesto and chutneys.                                                                                                                            |
| 8 | Fish and fish products        | J | Freshwater fish  |  | JA | SJA | <b>Including:</b> freshwater fish, meat only, including processed fish such as marinated, pickled, salt-preserved, smoked, canned or jarred, and manufactured fish products such as fish pastes and surimi.<br><b>Excluding:</b> dried fish.                                        |
|   |                               |   | Diadromous fish  |  | JB | SJB | <b>Including:</b> diadromous fish, meat only, including processed fish such as marinated, pickled, salt-preserved, smoked, canned or jarred, and manufactured fish products such as fish pastes and surimi.<br><b>Excluding:</b> dried fish.                                        |
|   |                               |   | Marine fish      |  | JC | SJC | <b>Including:</b> marine fish, meat only, including processed fish such as marinated, pickled, salt-preserved, smoked, canned or jarred, and manufactured fish products such as fish pastes and surimi.<br><b>Excluding:</b> dried fish.                                            |
|   |                               |   | Offal            |  | JD | SJD | <b>Including:</b> offal from all types of fish and shellfish, from mixed and unspecified sources, including processed offal such as marinated, pickled, salt-preserved, smoked, canned or jarred, and manufactured offal products such as pastes.<br><b>Excluding:</b> dried offal. |
|   |                               |   | Shellfish        |  | JE | SJE | <b>Including:</b> shellfish, crustaceans and molluscs, including processed shellfish such as marinated, pickled, salt-preserved, smoked, canned or jarred, and manufactured                                                                                                         |

|   |                        |   |                              |  |    |                                                                                                                                                                                                                                                                                                                                                                                                                                                                                                                                                                                |
|---|------------------------|---|------------------------------|--|----|--------------------------------------------------------------------------------------------------------------------------------------------------------------------------------------------------------------------------------------------------------------------------------------------------------------------------------------------------------------------------------------------------------------------------------------------------------------------------------------------------------------------------------------------------------------------------------|
|   |                        |   |                              |  |    | shellfish products such as pastes.<br><b>Excluding:</b> dried shellfish.                                                                                                                                                                                                                                                                                                                                                                                                                                                                                                       |
|   |                        |   | Processed fish and shellfish |  | JF | SJF<br><b>Including:</b> fish and shellfish, from mixed and unspecified sources, including processed fish and shellfish such as marinated, pickled, salt-preserved, smoked, canned or jarred, and manufactured fish and shellfish products such as pastes.<br><b>Excluding:</b> dried fish and shellfish.                                                                                                                                                                                                                                                                      |
|   |                        |   | Dried fish and shellfish     |  | JG | SJG<br><b>Including:</b> dried fish and shellfish, including dried freshwater fish, diadromous fish, marine fish, shellfish and offal and dried fish and shellfish of unspecified sources, including sun-dried and industrially dried, as well as dried fish products with added flavoring ingredients such as salt, sugar and soy sauce.                                                                                                                                                                                                                                      |
| 9 | Meat and meat products | M | Red meat                     |  | MA | SMA<br><b>Including:</b> mammal meat such as bovine, pork, equine, goat, sheep, camelid, deer, rabbit, kangaroo, game and marine mammal meat and meat from rodents such as guinea pigs and rats, as well as meat from reptiles and amphibians such as snails, crocodiles, frogs, snakes, turtles and lizards, including processed products such as cold meats (cured or seasoned), smoked meats, pre-cooked sausages, marinated meats, canned or tinned meats, and manufactured products such as meat-based spreads and gelatines.<br><b>Excluding:</b> offal and dried meats. |

|    |               |   |                     |  |    |     |                                                                                                                                                                                                                                                                                                                                                                                                  |
|----|---------------|---|---------------------|--|----|-----|--------------------------------------------------------------------------------------------------------------------------------------------------------------------------------------------------------------------------------------------------------------------------------------------------------------------------------------------------------------------------------------------------|
|    |               |   | Poultry             |  | MB | SMB | <p><b>Including:</b> bird meat such as from chicken, turkey, duck, goose, pigeon, ratites, quail, pheasant and other game birds, including processed products such as cold meats (cured or seasoned), smoked meats, pre-cooked sausages, marinated meats, canned or tinned meats, and manufactured products such as bird meat-based spreads.</p> <p><b>Excluding:</b> offal and dried meats.</p> |
|    |               |   | Offal               |  | MC | SMC | <p><b>Including:</b> organ meat such as from the liver, kidney, heart, lungs, intestines and blood of mammals and birds, from mixed and unspecified sources, including processed and manufactured offal products.</p> <p><b>Excluding:</b> dried offal.</p>                                                                                                                                      |
|    |               |   | Meat products       |  | MD | SMD | <p><b>Including:</b> meat, mixed and of unspecified source, including processed meat such as cold meats (cured or seasoned), smoked meats, pre-cooked sausages, marinated meats, canned or tinned meats, and manufactured products such as meat-based spreads.</p> <p><b>Excluding:</b> dried meats.</p>                                                                                         |
|    |               |   | Dried meat          |  | ME | SME | <p><b>Including:</b> dried meat, including from mammals, reptiles, amphibians, birds, and their offal, including sun-dried and industrially dried, and dried meat products with added flavoring ingredients such as salt, sugar and soy sauce.</p>                                                                                                                                               |
| 10 | Fats and oils | O | Animal fats and oil |  | OA | SOA | <p><b>Including:</b> Lards, tallows, fats, butters and oils of animal origin.</p>                                                                                                                                                                                                                                                                                                                |

|    |           |   |                        |  |    |     |                                                                                                                                                                                                                                                                                                                                                                            |
|----|-----------|---|------------------------|--|----|-----|----------------------------------------------------------------------------------------------------------------------------------------------------------------------------------------------------------------------------------------------------------------------------------------------------------------------------------------------------------------------------|
|    |           |   | Vegetable fats and oil |  | OB | SOB | <b>Including:</b> oils, butters and margarines derived from fruits such as olives, seeds such as sunflower, rapeseed and soybean, and other plants such as palms and red palm (oil derived from the mesocarp (reddish pulp) of the fruit of the oil palm, primarily the African oil palm ( <i>Elaeis guineensis</i> ), unrefined, red in color and rich in beta-carotene). |
| 11 | Beverages | P | Water                  |  | PA | SPA | <b>Including:</b> any type of water such as drinking water (including tap, well, and filtered tap water), regular bottled drinking water (including mineral water, flavored water, fortified water), boiling grains in water (including barley, rice, or sorghum water), sea salt water and zamzam water.                                                                  |
|    |           |   | Coffee                 |  | PB | SPB | <b>Including:</b> coffee including imitation coffee beverages, coffee beans, coffee-beverage preparation powder and other imitation coffee ingredients.                                                                                                                                                                                                                    |
|    |           |   | Tea                    |  | PC | SPC | <b>Including:</b> teas, herbal teas and infusions including ingredients for the preparation of such infusions (leaves, flowers, and roots), as well as powders based on teas, and infusions.<br><b>Excluding:</b> herbal beverages for young population group.                                                                                                             |
|    |           |   | Other drinks           |  | PD | SPD | <b>Including:</b> cocoa beans, powders based on cocoa and any other drink<br><b>Excluding:</b> coffee, tea, clear broths, soft drinks, and fruit and vegetable drinks, and infusions for young population group, and special drinks for child development and growth.                                                                                                      |
|    |           |   | Clear broths           |  | PE | SPE | <b>Including:</b> broth-based clear soups solid-free not contain like pulp in juices and soups without noodles or vegetables.                                                                                                                                                                                                                                              |

|    |                                         |   |                             |    |     |                                                                                                                                                                                                                                                                                                                      |
|----|-----------------------------------------|---|-----------------------------|----|-----|----------------------------------------------------------------------------------------------------------------------------------------------------------------------------------------------------------------------------------------------------------------------------------------------------------------------|
|    |                                         |   |                             |    |     | <b>Excluding:</b> any soups include any form of solid food such as noodles or vegetables or meat.                                                                                                                                                                                                                    |
|    |                                         |   | Soft drinks                 | PF | SPF | <b>Including:</b> soft drinks including carbonated, water-based and flavored drinks such as cola-type drinks, flavored soft drinks, soft drinks with fruit content below 25% and other soft drinks such as functional drinks and drink mixes.                                                                        |
|    |                                         |   | Fruit and vegetable drinks  | PG | SPG | <b>Including:</b> drinks that consist of 25–99% fruit or vegetable juice, such as fruit nectars (with minimum 25–50% fruit), smoothies and fruit or vegetable juice concentrates, extracts and powders.<br><b>Excluding:</b> 100% fresh fruit or vegetable juice, and juices and nectars for young population group. |
|    |                                         |   | Non-alcoholic drinks        | PH | SPH | <b>Including:</b> drinks that known to be alcoholic but it's nowadays also presents in nonalcoholic form such as beer, wine, and other.                                                                                                                                                                              |
| 12 | Sweets and Sugars, preserves and snacks | S | Dough-based sweets          | SA | SSA | <b>Including:</b> sweets made predominantly with dough such as bakery and pastry products (fried and baked sweet doughs, laminated dough, cakes, cookies, biscuit, crackers, waffles, etc.) which may also contain non-cereal components such as creams, fillings and toppings.                                      |
|    |                                         |   | Chocolate-based sweets      | SB | SSB | <b>Including:</b> sweets made predominantly with chocolate or cocoa such as various types of chocolates, pralines, chocolate spreads and sauces which may also contain other ingredients.                                                                                                                            |
|    |                                         |   | Fruit- and nut-based sweets | SC | SSC | <b>Including:</b> sweets made predominantly from fruits or nuts, or in some cases vegetables where these ingredients are processed with sugar (candied or chocolate-coated fruits, jams, marmalades, fruit jellies, etc.) but which may also contain other ingredients.                                              |

|    |                                       |   |                                     |  |    |     |                                                                                                                                                                                                                                                                                                                                                                                                                                            |
|----|---------------------------------------|---|-------------------------------------|--|----|-----|--------------------------------------------------------------------------------------------------------------------------------------------------------------------------------------------------------------------------------------------------------------------------------------------------------------------------------------------------------------------------------------------------------------------------------------------|
|    |                                       |   | Other sweets                        |  | SD | SSD | <b>Including:</b> any other sweets that are not made predominantly from dough, chocolate, fruits, nuts or dairy such as candies, jellies and sweet bars, desserts, sweet dessert sauces and toppings.                                                                                                                                                                                                                                      |
|    |                                       |   | Sugars                              |  | SE | SSE | <b>Including:</b> sugars such as mono- and disaccharides (sucrose, lactose, galactose, etc.), syrups (molasses and similar), maltodextrins (maltodextrin, dextrin and polydextrose), honey and others (polyols, polyfructoses, etc.).                                                                                                                                                                                                      |
| 13 | Foods for particular nutritional uses | R | Special foods for young populations |  | RA | SRA | <b>Including:</b> foods for young children (above 12 months (>1-year-old)) such as follow-up formulas, ready-to-eat meals for young children, processed cereal-based foods, herbal beverages, infusions, juices and nectars for this population group, and special foods for child development and growth.<br><b>Excluding:</b> follow-on formulas that include any formula that fed for babies above 1 years old and never fed for under. |
|    |                                       |   | Foods for weight reduction          |  | RB | SRB | <b>Including:</b> foods for weight reduction including total daily diet and single meal replacements for weight reduction.                                                                                                                                                                                                                                                                                                                 |
|    |                                       |   | Foods for sports and fitness        |  | RC | SRC | <b>Including:</b> foods for sports and fitness including carbohydrate-rich energy food products, carbohydrate–electrolyte solutions, protein and protein components, micronutrient supplements, and carnitine and carnitine-based supplements for athletes, sportspeople and similar.                                                                                                                                                      |
|    |                                       |   | Foods for medical purposes          |  | RD | SRD | <b>Including:</b> dietary foods for special medical purposes including nutritionally complete and incomplete formulas, formulas for metabolic disorders and oral rehydration products.                                                                                                                                                                                                                                                     |

|    |                              |   |                                                               |  |    |     |                                                                                                                                                                                                                                                                                                         |
|----|------------------------------|---|---------------------------------------------------------------|--|----|-----|---------------------------------------------------------------------------------------------------------------------------------------------------------------------------------------------------------------------------------------------------------------------------------------------------------|
| 14 | Food supplements and similar | U | Food supplements and similar                                  |  | UA | SUA | <b>Including:</b> food supplements and similar preparations such as vitamin and mineral supplements, protein and amino-acid supplements, enzyme and coenzyme formulations and natural supplements such as bee-produced, herbal, algae-based, yeast-based probiotic or prebiotic and other formulations. |
| 15 | Food additives               | V | Sweeteners and flavourings                                    |  | VA | SVA | <b>Including:</b> sweeteners and flavorings such as table-top sweeteners, essences and extracts, and artificial sweeteners (aspartame, saccharine, etc.).                                                                                                                                               |
|    |                              |   | Colourants                                                    |  | VB | SVB | <b>Including:</b> colorants including natural and artificial food colors.                                                                                                                                                                                                                               |
|    |                              |   | Other food additives                                          |  | VC | SVC | <b>Including:</b> other food additives such as preservatives, gelling agents and acid.                                                                                                                                                                                                                  |
|    |                              |   | Ingredients for food fortification/enrichment and supplements |  | VD | SVD | <b>Including:</b> ingredients for food fortification/enrichment and supplements such as vitamins, chemical elements (microelements), dietary fiber, phytochemicals, caffeine, etc.                                                                                                                      |
|    |                              |   | Microbiological or enzymatic ingredients                      |  | VE | SVE | <b>Including:</b> microbiological or enzymatic ingredients such as starter cultures, yeast cultures, enzymes for food manufacture and moulds or microfungus cultures.                                                                                                                                   |
| 16 | Composite dishes             | T | Meat-based dishes                                             |  | TA | STA | <b>Including:</b> composite dishes, in which the main ingredient is meat, such as meat or offal stews, meat loafs, muqlqal, and hamsa.<br><b>Excluding:</b> soups.                                                                                                                                      |
|    |                              |   | Fish-based dishes                                             |  | TB | STB | <b>Including:</b> composite dishes, in which the main ingredient is fish or other seafood, such as fish and seafood stews, salads and cakes.<br><b>Excluding:</b> soups.                                                                                                                                |
|    |                              |   | Egg-based dishes                                              |  | TC | STC | <b>Including:</b> composite dishes, in which the main ingredient is egg, such as omelets, shakshuka, fried eggs,                                                                                                                                                                                        |

|  |                                     |  |    |                                                                                                                                                                                                                                                                                                                                         |
|--|-------------------------------------|--|----|-----------------------------------------------------------------------------------------------------------------------------------------------------------------------------------------------------------------------------------------------------------------------------------------------------------------------------------------|
|  |                                     |  |    | and scrambled egg.<br><b>Excluding:</b> soups and any dishes that eggs are one of many ingredients and not consider as the main such as: cakes, sandwiches, pancake, and other.                                                                                                                                                         |
|  | Potato-based dishes                 |  | TD | STD<br><b>Including:</b> composite dishes, in which the main ingredient is potato, such as baked potato pies, potato salads, potato croquettes and various meals with potatoes and meat, cheese, vegetables or other ingredients.<br><b>Excluding:</b> soups.                                                                           |
|  | Legume-based dishes                 |  | TE | STE<br><b>Including:</b> composite dishes, in which the main ingredients are legumes or legume-based products (e.g. tofu), such as legume or tofu salads, legume stews and various meals with legumes and meat, cheese, vegetables or other ingredients such as Lentil Fatteh, and green beans stew (edam).<br><b>Excluding:</b> soups. |
|  | Vegetable-based dishes              |  | TF | STF<br><b>Including:</b> composite dishes, in which the main ingredient is vegetables, such as vegetable stews (such as molokhia), creams and soufflés. Vegetable-based dishes also include mushroom-based dishes.<br><b>Excluding:</b> soups.                                                                                          |
|  | Bread-based dishes and finger foods |  | TG | STG<br><b>Including:</b> composite dishes, in which the main ingredient is bread, such as pizzas and stuffed breads, sandwiches and hamburgers. Bread-based dishes also include finger foods in which the main ingredient is bread.<br><b>Excluding:</b> soups.                                                                         |
|  | Pasta- and noodle-based dishes      |  | TH | STH<br><b>Including:</b> composite dishes, in which the main ingredient is pasta or noodles, such as stuffed pasta and                                                                                                                                                                                                                  |

|    |        |   |                        |    |     |                                                                                                                                                                                                                                                                           |
|----|--------|---|------------------------|----|-----|---------------------------------------------------------------------------------------------------------------------------------------------------------------------------------------------------------------------------------------------------------------------------|
|    |        |   |                        |    |     | <p>pasta or noodles with sauces typically containing meat, cheese, vegetables or other ingredients.<br/> <b>Excluding:</b> soups.</p>                                                                                                                                     |
|    |        |   | Rice-based dishes      | TI | STI | <p><b>Including:</b> composite dishes, in which the main ingredient is rice, such as rice with sauces typically containing meat, cheese, vegetables or other ingredients, as well as dishes such as paella, rice pudding and milk rice.<br/> <b>Excluding:</b> soups.</p> |
|    |        |   | Dtae- based dishes     |    | STL | <p><b>Including:</b> composite dishes, in which the main ingredient is date, such as date cake, cheesecake, porridge, Areekah, qashed.<br/> <b>Excluding:</b> processed date products.</p>                                                                                |
|    |        |   | Savoury pies and tarts | TJ | STJ | <p><b>Including:</b> composite dishes with various ingredients, served in the form of pies or tarts, such as quiche, typically containing eggs and meat, cheese, vegetables or other ingredients.</p>                                                                     |
|    |        |   | Soups                  | TK | STK | <p><b>Including:</b> soups, including home-made soups and dry mixtures, typically containing vegetables, meat, legumes or other ingredients, such as meat and vegetable soups, gazpacho, and fruit, dairy and egg soups.</p>                                              |
| 17 | Snacks | K | Crisps and curls       | KA | SKA | <p><b>Including:</b> fried or baked savory chips prepared from tubers or cereals, such as potato chips, corn chips, or rice grain chips.</p>                                                                                                                              |
|    |        |   | Other snacks           | KB | SKB | <p><b>Including:</b> other savory snacks prepared from tubers.</p>                                                                                                                                                                                                        |
